# Supplementary material for: Hydroxychloroquine for pre-exposure prophylaxis of COVID-19 in health care workers: a randomized, multicenter, placebo-controlled trial (HERO-HCQ)
Source: bioRxiv or medRxiv preprint supplement (doi:10.1101/2021.08.19.21262275), 2021-08-25
Supplement: Supplementary file [file media-1.pdf]

**Supplemental Figure 1. HERO Registry and HERO-HCQ Trial Timeline**

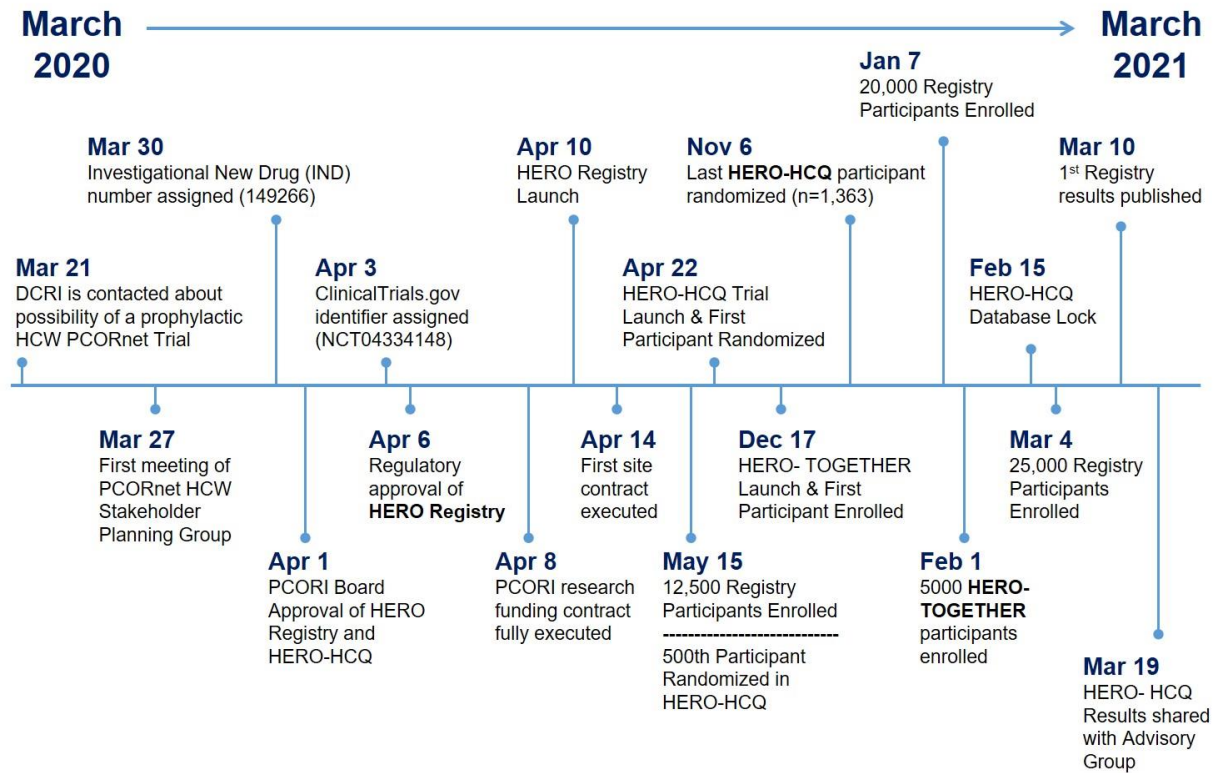

**Supplemental Table 1.** Participating PCORnet HERO-HCQ Trial Sites

|                                                          |
|----------------------------------------------------------|
| AdventHealth Orlando                                     |
| Allina Health                                            |
| Baylor Scott and White Memorial Hospital                 |
| Children's Hospital Colorado                             |
| Clinical Trials Center of Middle Tennessee               |
| Columbia University Medical Center                       |
| Duke University Hospital                                 |
| Hospital for Special Surgery                             |
| Johns Hopkins Hospital                                   |
| Marshfield Clinic                                        |
| Mayo Clinic                                              |
| Michigan Medicine                                        |
| New York Presbyterian/Weill Cornell Medical Center       |
| Northwestern University                                  |
| Ochsner Clinic Foundation                                |
| Rush University Medical Center                           |
| Seattle Children's Hospital                              |
| Tampa General Hospital                                   |
| Temple University Hospital                               |
| The Ohio State University Wexner Medical Center          |
| University Medical Center- New Orleans                   |
| University of Florida Health                             |
| University of Florida Health Central Florida             |
| University of Florida Jacksonville Shands Medical Center |
| University of Iowa                                       |
| University of Kansas Medical Center                      |
| University of Miami Miller School of Medicine            |
| University of Missouri - Columbia                        |
| University of Nebraska Medical Center                    |
| University of North Carolina at Chapel Hill              |
| University of Pittsburgh School of Medicine              |
| University of Texas Southwestern Medical Center Dallas   |
| Vanderbilt University Medical Center                     |
| Wake Forest Baptist Medical Center                       |

**Supplemental Table 2.** Comparison of Confidence Interval (CI) Estimates for the Primary Analysis

| <b>CI Method</b>       | <b>95% CI (% scale)</b> |
|------------------------|-------------------------|
| Miettinen-Nurminen     | -4.60, 0.87             |
| Chang-Zhang            | -4.61, 0.90             |
| Agresti-Caffo          | -4.55, 0.88             |
| Hauck-Anderson         | -4.61, 0.94             |
| Miettinen-Nurminen-Mee | -4.60, 0.87             |
| Newcombe               | -4.59, 0.88             |
| Newcombe (corrected)   | -4.69, 0.99             |
| Wald (corrected)       | -4.68, 1.01             |

Note: the point estimate is -1.84% favoring HCQ vs. placebo at Day 30. The 2-sided Fisher's exact p-value is 0.20.

**Supplemental Table 3.** Comparison of COVID PREP and HERO-HCQ studies

|                                     | <b>COVID PREP<br/>(NCT04328467)</b>                                                                                                                                                                                       | <b>HERO-HCQ<br/>(NCT04334148)</b>                                                              |
|-------------------------------------|---------------------------------------------------------------------------------------------------------------------------------------------------------------------------------------------------------------------------|------------------------------------------------------------------------------------------------|
| Randomization ratio                 | 2:2:1:1<br><br>(the placebo arms were pooled)                                                                                                                                                                             | 1:1                                                                                            |
| HCQ dosage                          | Loading dose of 400 mg (two 200-mg tablets) twice separated by 6-8 hours followed by (i) 400 mg (two 200-mg tablets) <b>once</b> weekly for 12 weeks or (ii) 400 mg (two 200-mg tablets) <b>twice</b> weekly for 12 weeks | 600-mg loading dose of study drug twice on the first day, followed by 400 mg daily for 29 days |
| Maximum follow-up                   | 3 months                                                                                                                                                                                                                  | Treatment period for 30 days with follow-up at Day 60                                          |
| Planned sample size                 | ~3,150 HCW<br>(1050 per arm)                                                                                                                                                                                              | 15,000 HCW<br>(7500 per arm)                                                                   |
| Final sample size<br>(% of planned) | 1483<br>(47.2%)                                                                                                                                                                                                           | 1359<br>(9.1%)                                                                                 |
| HCQ primary endpoint event rate     | 58/989 (5.9%)                                                                                                                                                                                                             | 41/683 (6.0%)                                                                                  |
| Placebo primary endpoint event rate | 39/494 (7.9%)                                                                                                                                                                                                             | 53/676 (7.8%)                                                                                  |

Mantel–Haenszel Common Odds Ratio = **0.74 (95% CI 0.55 to 1.00)**, **p= 0.046**. Breslow-Day Test of Homogeneity p-value= 0.92.
